# Supplementary material
Source: PubMed Central journal article supplement (PMC4044831)
Supplement: supp_pp.113.231274_231274Supplementary_material.pdf [file supp_pp.113.231274_231274Supplementary_material.pdf]

## Supplementary data

### Material and method for supplementary material

For quantitative RT-PCR analysis, total RNA was extracted from pollen using RNAqueous (Ambion Inc) and other tissues using Trizol (Invitrogen Inc) according to the manufacturer's instructions. After DNase treatment, 1 µg of total RNA was reverse transcribed and quantitative PCR analysis was performed using an Optican 2 real-time PCR machine (Bio-Rad). Relative levels of each transcript were calculated after being normalized to the *UBC21* control. Primers used in quantitative PCR were: *MPK3* (5'TGACGTTTGACCCCAACAGA3' and 5'CTGTTCCATCCAGAGGCTG3'), *MPK6* (5'TGTTTGGTCTGTAGGCTGTATT3' and 5'GCTGTCTTATGTATCGCTTTGC3'), *UBC21* (5'CTGCGACTCAGGGAATCTTCTAA3' and 5'TTGTGCCATTGAATTGAACCC3').

To generate the *LAT52* promoter driven *YFP-MPK3* and *YFP-MPK6* fusion constructs, we first replaced the *35S* promoter in a modified *pBII21* with the *LAT52* promoter. *YFP* cDNA was then PCR cloned and insert into the Xho I and Spe I sites to make the *pBI-LAT52:YFP* intermediate construct. *MPK3* and *MPK6* cDNA was then cloned into the Spe I and EcoCR I sites to generate the final constructs. For subcellular localization, pollen was germinated in liquid pollen germination medium, and fluorescence microscopy was performed 2 hours after germination.

**Table S1. Distribution of *mpk3 mpk6* fertilized seeds in siliques from wild type pistils pollinated with pollen grains from *mpk3<sup>-/-</sup> mpk6<sup>+/-</sup>* plants.**

| Pistil # | Segregation ( <i>mpk3 mpk6</i> : <i>mpk3 MPK6</i> fertilized seeds) |            |       |
|----------|---------------------------------------------------------------------|------------|-------|
|          | Upper half                                                          | Lower half | Total |
| 1        | 1:19                                                                | 1:25       | 2:44  |
| 2        | 2:20                                                                | 1:20       | 3:40  |
| 3        | 2:22                                                                | 2:23       | 4:45  |

Genotypes of male parent, *mpk3<sup>-/-</sup> mpk6<sup>+/-</sup>*; and female parent, wild type. Segregation, transmission of *mpk3 mpk6* and *mpk3 MPK6* pollen based on the genotypes of the progenies.

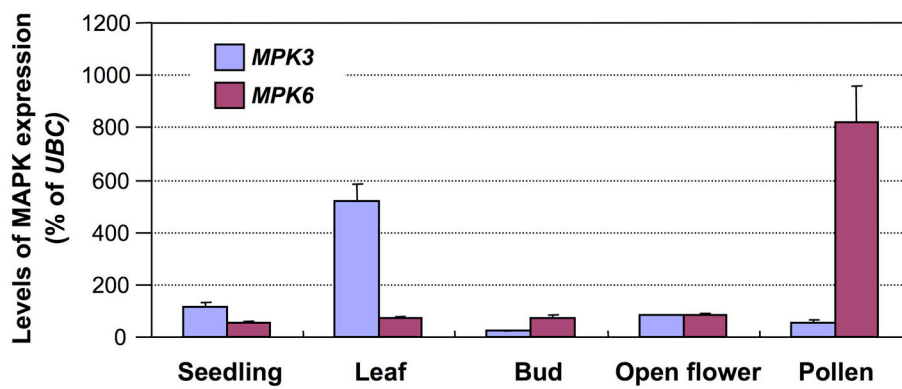

**Supplemental Figure S1.** *MPK6* expression is higher than *MPK3* in pollen.

Expression of *MPK3* and *MPK6* in different tissues is quantified by the percentage of reference gene, *UBC21*. Error bar=s.d.

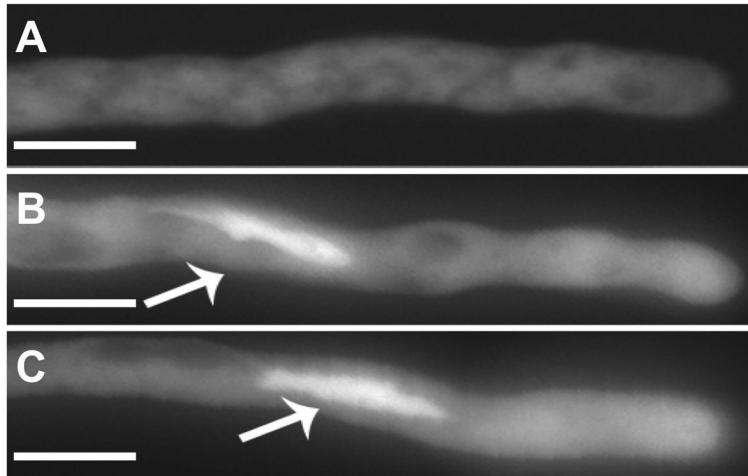

**Supplemental Figure S2.** Subcellular localization of MPK3 and MPK6 fusion protein.

(A) Subcellular localization of free YFP protein in pollen tube. (B) Subcellular localization of YFP-MPK3 fusion protein in pollen tube. (C) Subcellular localization of YFP-MPK6 fusion protein in pollen tube. Arrows indicate the localization of YFP-tagged MAPKs in the nuclei. Bar=10  $\mu\text{m}$ .

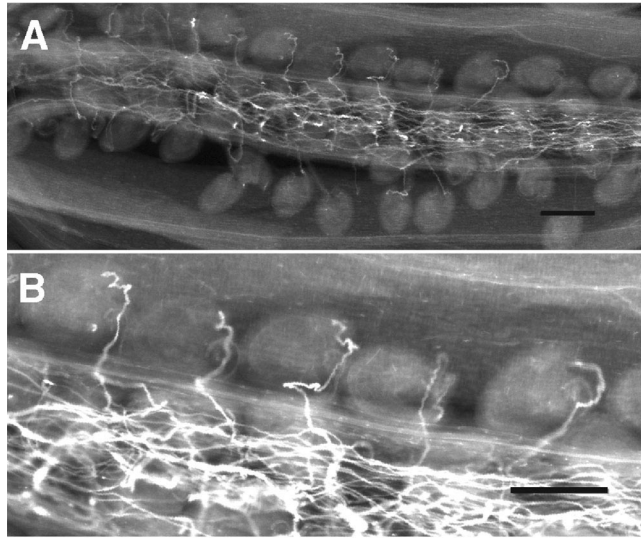

**Supplemental Figure S3.** *In vivo* tube growth of pollen grains from  $mpk3^{-/-} mpk6^{+/-}$  plants in excessive pollination.

(A) Aniline blue staining of a pistil pollinated with pollen grains from  $mpk3^{-/-} mpk6^{+/-}$  plants. (B) Close up view of pistil in (A). Note only one pollen tube landed on each funiculus and fertilized the ovule. Bar=100  $\mu$ m.

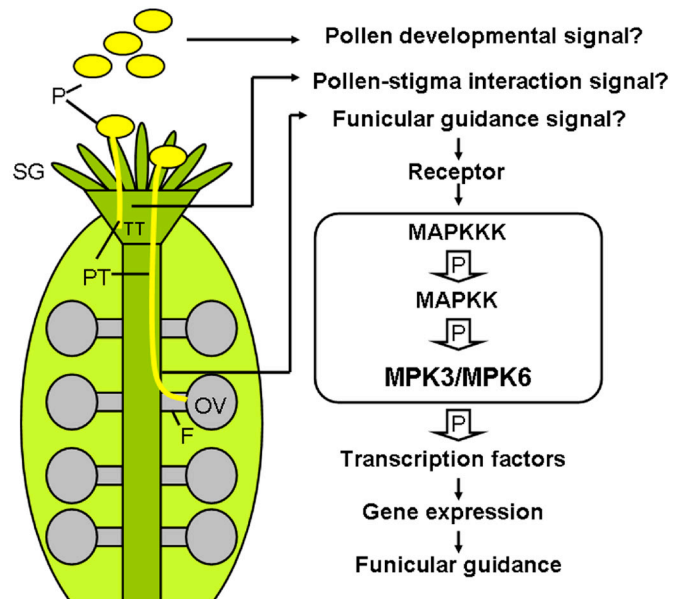

**Supplemental Figure S4.** Proposed model for MPK3/MPK6 signaling in pollen tube guidance.

MPK3/MPK6 signaling cascade may be activated in developing or mature pollen, during pollen tube germination and penetration of pistils, or by funicular guidance cues during pollen tube guidance. MPK3/MPK6 in turn activate downstream transcription factors to regulate the expression of funicular guidance related genes.
